# Supplementary material
Source: Research Square preprint supplement (doi:10.21203/rs.3.rs-9304377/v1)
Supplement: Supplementary file 1 [file 20ce0e86457e7dbd3be1a8ea.pdf]

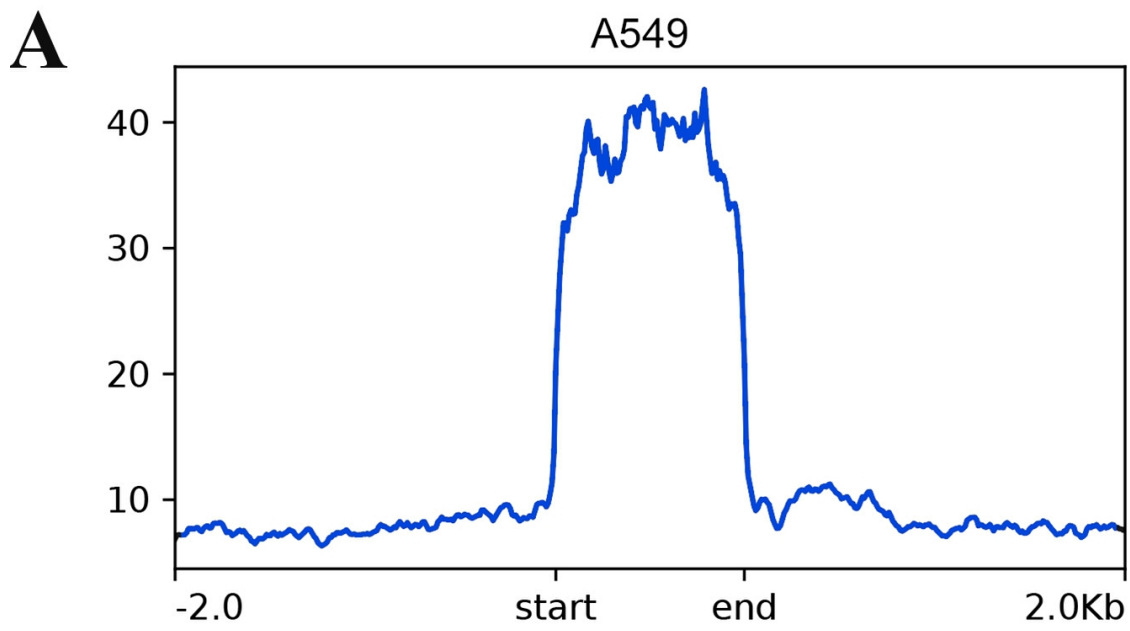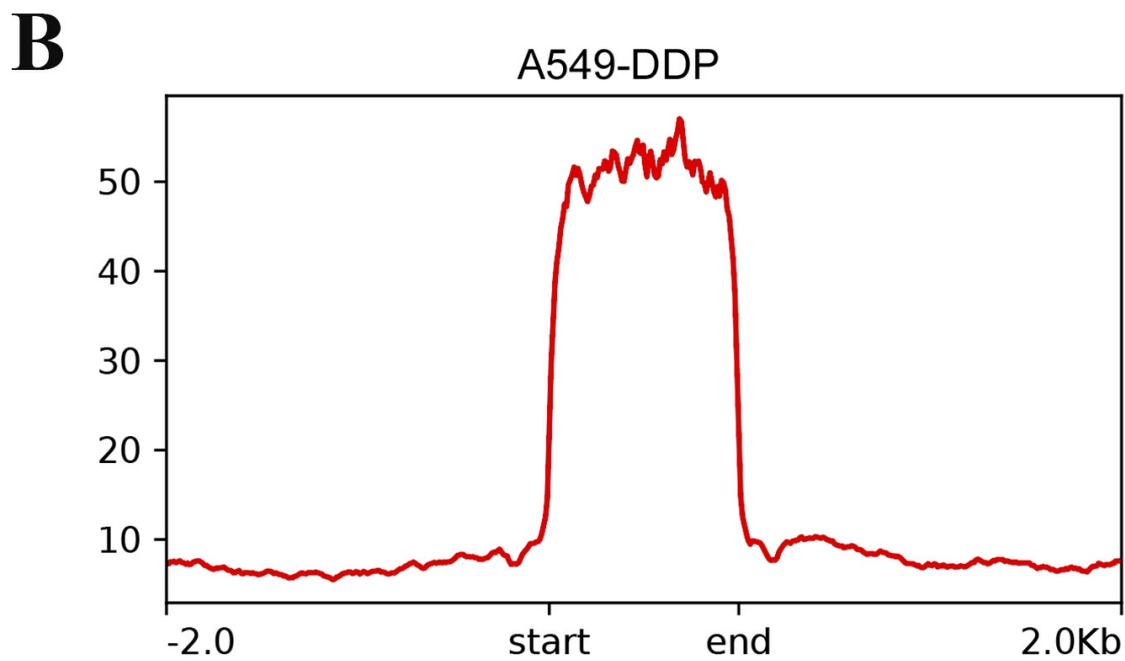

**Supplementary Figure S1.** Aggregate H3K27ac signal density plots centered on enhancer regions in A549 (A) and A549-DDP cells (B).

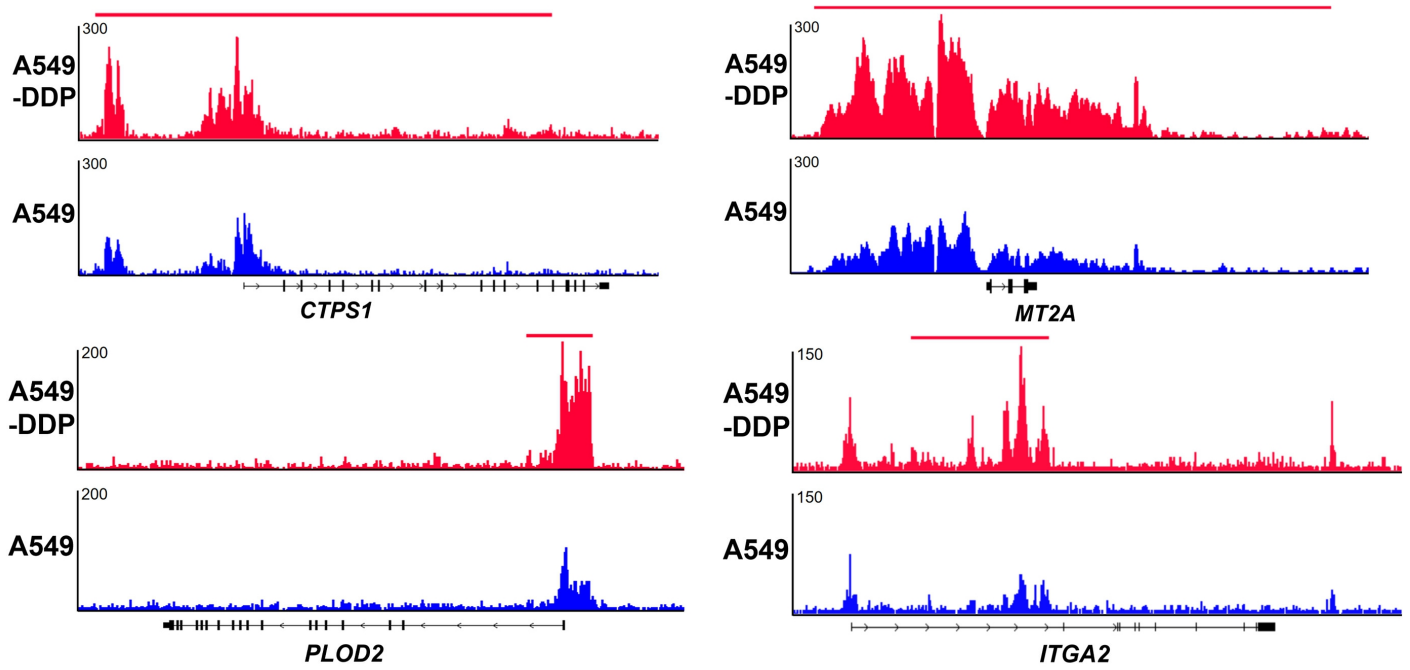

**Supplementary Figure S2.** Genome browser tracks illustrating H3K27ac enrichment at chemoresistance-related genes in A549-DDP versus A549 cells.

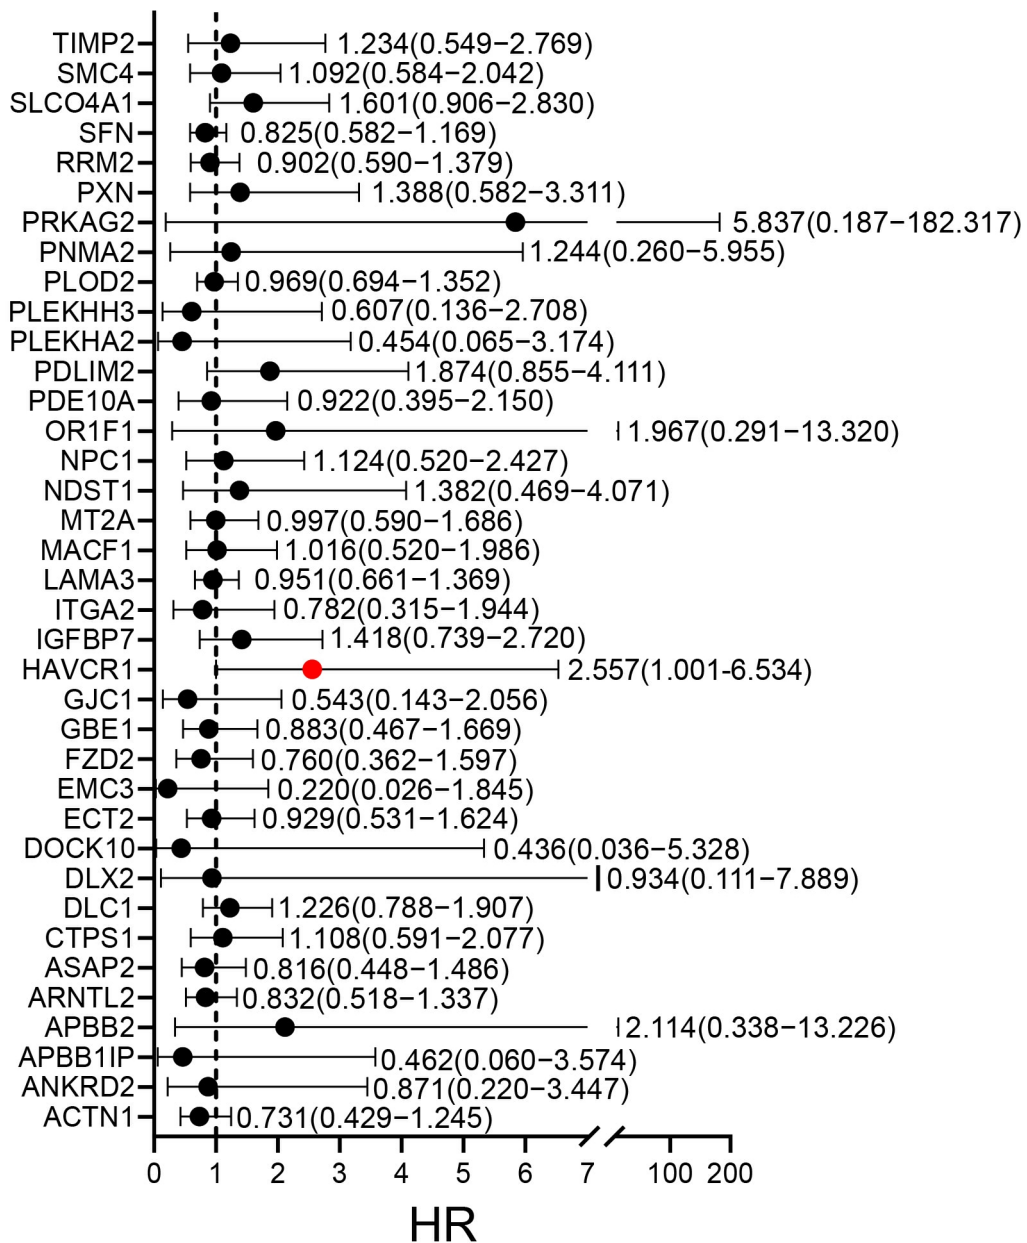

**Supplementary Figure S3.** Forest plot of univariate Cox regression analysis for 46 SE-associated genes in the JBR.10 cohort (GSE14814).

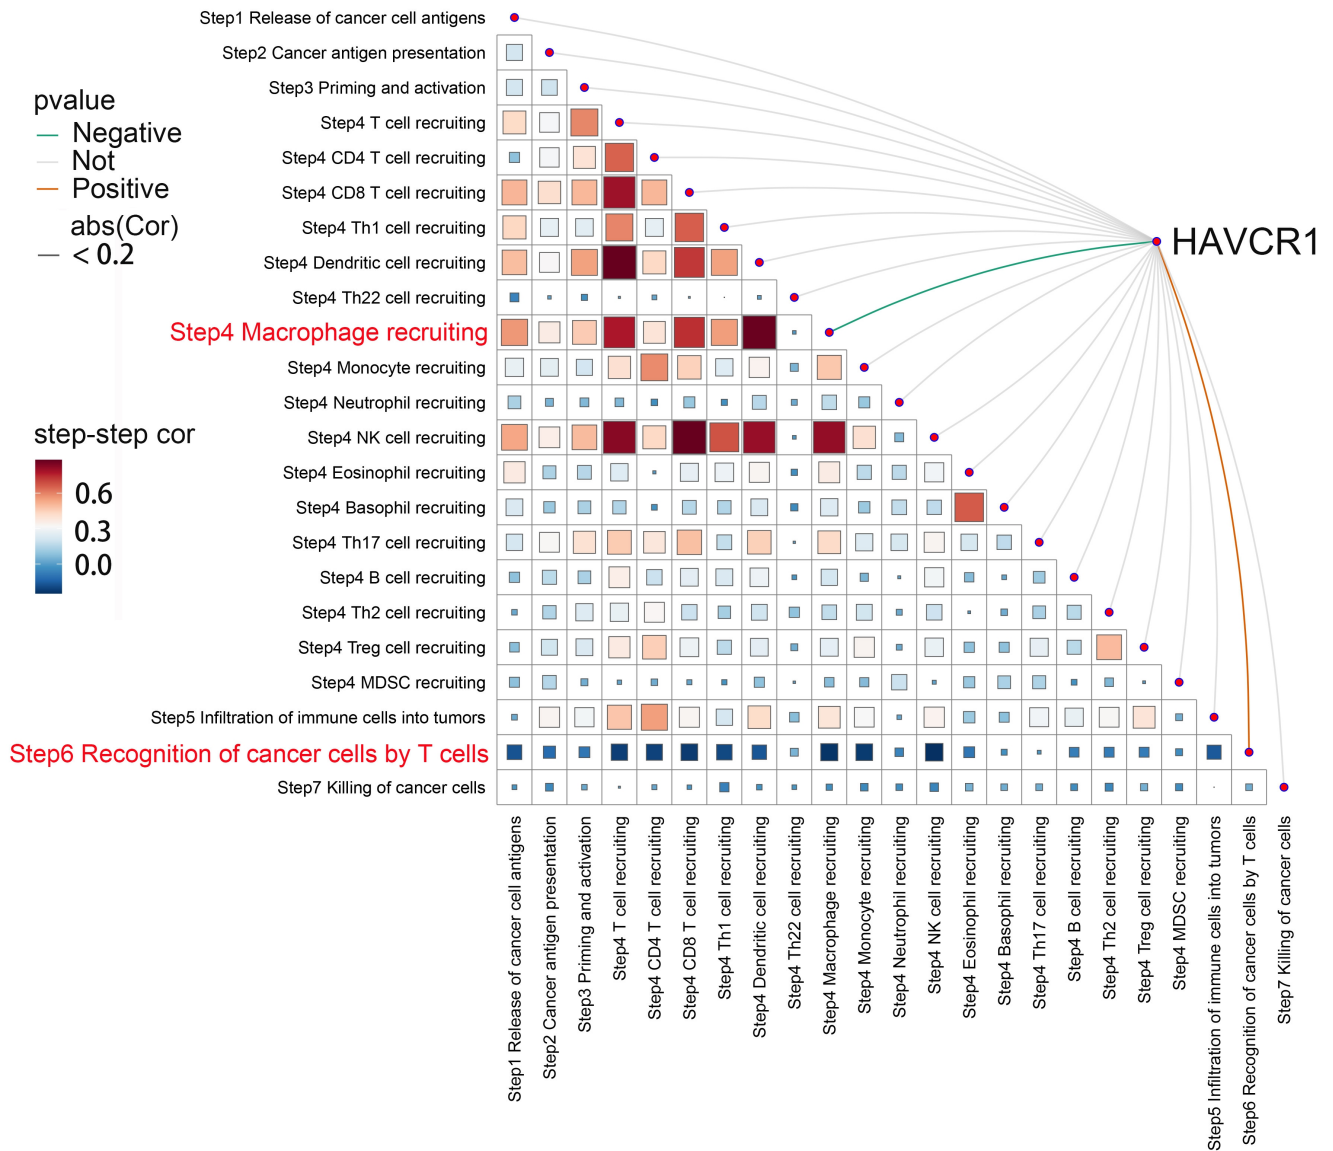

**Supplementary Figure S4.** Associations between HAVCR1 expression and individual steps of the cancer-immunity cycle by the TIP analysis.

### Metastatic urothelial carcinoma with atezolizumab treatment

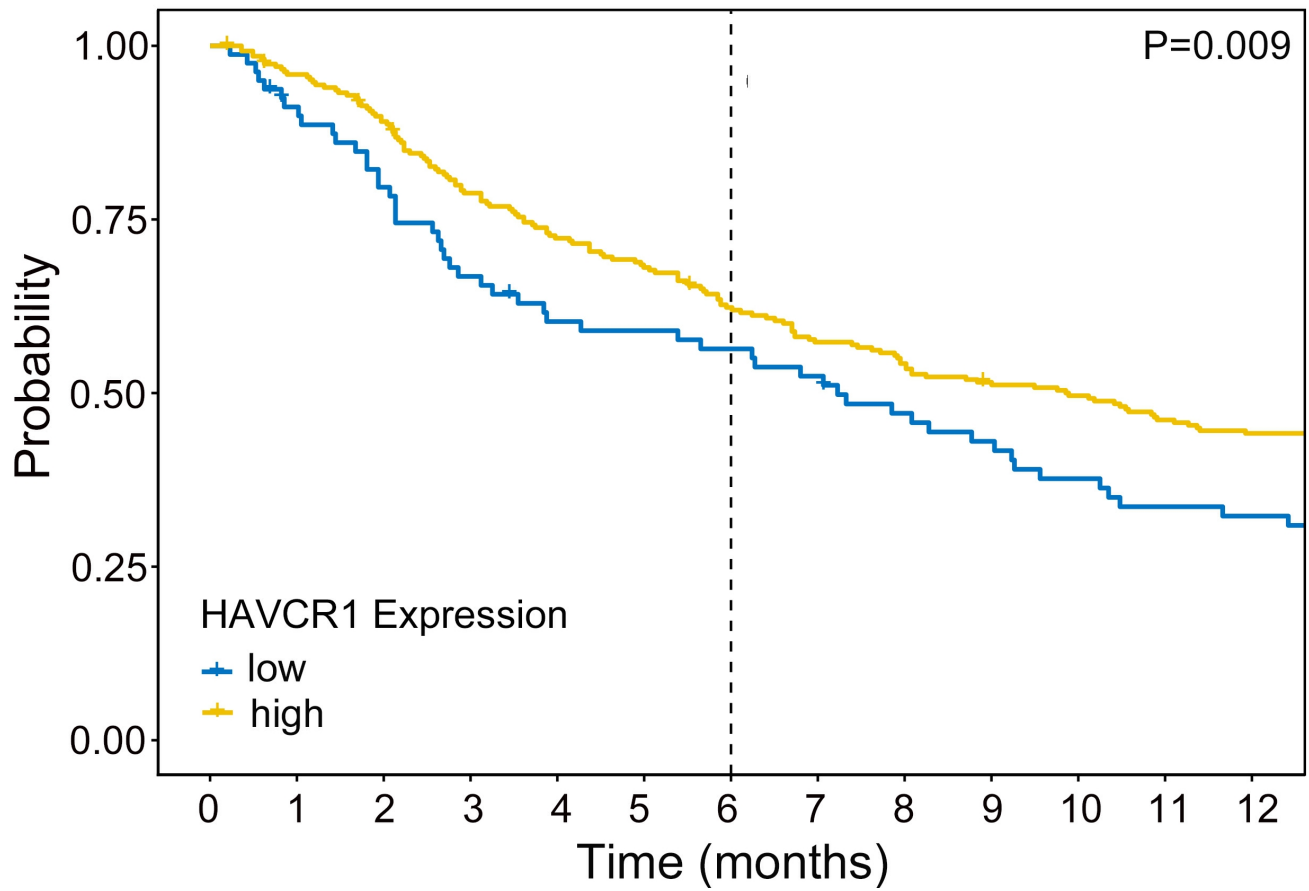

**Supplementary Figure S5.** KM survival analysis according to HAVCR1 expression in the IMvigor210 cohort.
